# Supplementary material for: GC-TOF/MS-Based Metabolomics for Comparison of Volar and Non-Volar Skin Types
Source: MDPI journal article supplement (doi:10.3390/metabo12080717), 2022-08-03
Supplement: s1 [file s1]

## Supplemental material

**Table S1.** Identified metabolites in volar skin and non-volar skin based on their chemical structures.

| Identified metabolites                |                      |                           |
|---------------------------------------|----------------------|---------------------------|
| <b>Amines (10)</b>                    |                      |                           |
| adenosine                             | inosine              | uracil                    |
| ethanolamine                          | spermidine           | hypoxanthine              |
| guanosine                             | thymine              | ornithine                 |
| xanthine                              |                      |                           |
| <b>Amino acids (24)</b>               |                      |                           |
| 2-ketoisocaproic acid                 | glutamate            | N-methylalanine           |
| alanine                               | glycine              | oxoproline                |
| asparagine                            | isoleucine           | phenylalanine             |
| aspartic acid                         | L-cysteine           | proline                   |
| $\beta$ -alanine                      | leucine              | serine                    |
| citrulline                            | lysine               | threonine                 |
| cyano-L-alanine                       | methionine           | tyrosine                  |
| 3-aminoisobutyric acid                | N-carbamoylaspartate | valine                    |
| <b>Sugars and sugar alcohols (18)</b> |                      |                           |
| 1,5-anhydroglucitol                   | fuculose             | maltotriose               |
| glycerol                              | fructose             | mannose                   |
| mannitol                              | galactose            | tagatose                  |
| myo-inositol                          | glucose              | threose                   |
| threitol                              | lactose              | trehalose                 |
| fucose                                | lactulose            | xylose                    |
| <b>Organic acids (19)</b>             |                      |                           |
| salicylic acid                        | glyceric acid        | phosphogluconic acid      |
| $\beta$ -hydroxybutyric acid          | glycolic acid        | phthalic acid             |
| citric acid                           | hexonic acid         | $\alpha$ -ketoglutarate   |
| fumarate                              | lactic acid          | pyrrole-2-carboxylic acid |
| galactonic acid                       | oxalic acid          | pyruvate                  |
| galacturonic acid                     | phenylacetic acid    | succinic acid             |
| terephthalate                         |                      |                           |
| <b>Fatty acids (12)</b>               |                      |                           |
| 1-monopalmitin                        | dodecanoate          | lignoceric acid           |
| 1-monostearin                         | heptadecanoic acid   | pentadecanoic acid        |
| arachidic acid                        | nonanoate            | palmitate                 |
| decanoate                             | myristic acid        | stearic acid              |

**Phosphates (8)**

adenosine-5-monophosphate

cytidine-5-monophosphate

fructose-6-phosphate

ribulose-5-phosphate

glycerol-1-phosphate

glucose-6-phosphate

pyrophosphate

phosphate

**Others (5)**

carnitine

urea

lactobionic acid

nicotinamide

O-phosphorylethanolamine

---
